# Supplementary material for: Restricted Sequence Variation in Streptococcus pyogenes Penicillin Binding Proteins
Source: PubMed Central journal article supplement (PMC7193039; doi:10.1128/msphere.00090-20), 2020-04-29
Supplement: mSphere.00090-20-sf001.pdf [file mSphere.00090-20-sf001.pdf]

|                                            |                                                                       |     |
|--------------------------------------------|-----------------------------------------------------------------------|-----|
| <i>S.pneumoniae</i> _R6_NP_357898.1        | ----MKWTKRVIRYA--TKNRKSPAENRRRVGKSLSLLSVVFVFAIFLVNFVAVIIGTGTRF        | 54  |
| <i>S.agalactiae</i> _2603V/R_NP_687322.1   | MTFFKLLKKIFLDYVIHIDRRSPQKNRERVGQNLMLTIFLFFIFINFVIVGTDSKF              | 60  |
| <i>S.pyogenes</i> _MGAS315_WP_011106648.1  | ---MKKWQKQVLDYV--VRDRRTPVENRVRVVGQNMMLLTIFIFIFFIFINFMIIIGTDQKF        | 55  |
| <i>S.equisimilis</i> _RE378_WP_015017311.1 | ---MRKWQKYFLDYV--VRDRRTPVQNRVVRVVGQNMMLLTIFVFFFIFINFMIIIGTDQKF        | 55  |
|                                            | * * .: * . ::::* :* * :.: ::::* * * ::* * :* :* * . :*                |     |
| <i>S.pneumoniae</i> _R6_NP_357898.1        | GTDLAKEAKKVHQTRTRVPAKRGTIYDRNGVPIAEDATSYNVYAVIDENYKSATGKILYV          | 114 |
| <i>S.agalactiae</i> _2603V/R_NP_687322.1   | GVNLSKEAKKVYQQSMTVQAKRGTIYDRNGNPIAEDATTYSLYAIISKNYTTATGQKLYV          | 120 |
| <i>S.pyogenes</i> _MGAS315_WP_011106648.1  | GVSLSEGAKKVYQETVTIQAKRGTIYDRNGTAIAVDSTTYSIYAILDKSFVSASDEKLYV          | 115 |
| <i>S.equisimilis</i> _RE378_WP_015017311.1 | GVSLSEGAKKVYQETVTIQAKRGTIYDRNGTAIAVDSTTYSIYAILDKSFVSASDEKLYV          | 115 |
|                                            | *..*.: ****:* : * : ***** ** *:*:*:*:*:..: :*.: **                    |     |
| <i>S.pneumoniae</i> _R6_NP_357898.1        | EKTQFNKVAEVFHKYLDMEESYVREQLSQPNLKQVSGAKGNGITYANMMSIKKELEAAE           | 174 |
| <i>S.agalactiae</i> _2603V/R_NP_687322.1   | QPSQYEKVASILENKLGMKKNLVKQLNQKLFQVSGSSGSLSYTKMADIKKTMEKSD              | 180 |
| <i>S.pyogenes</i> _MGAS315_WP_011106648.1  | QPSQYETVADILKHLGMKKTQVQKQLKRLKGLFQVSGPSGSGISYSYTMSTIQKAMEDAK          | 175 |
| <i>S.equisimilis</i> _RE378_WP_015017311.1 | QPSQYDKVAAILKEHLGMKKTQVQKQLKRLKGLFQVSGTSGSGISYSYTMSTIQKAMEAAK         | 175 |
|                                            | : *:*:*.* :.: *.*:* . * :*:* : * ***** .*.*:*:*.* *:* :* ..           |     |
| <i>S.pneumoniae</i> _R6_NP_357898.1        | VKGIDFTTSPNRSYPNGQFASSFIGLAQLHENE-DGSKSLLGTSGMESSLNSILAGTDGI          | 233 |
| <i>S.agalactiae</i> _2603V/R_NP_687322.1   | IKGIGFSTSPGRIYPNGIFASQFIGFTLPQDDG--DGKLVGNTGLEAALNKVLSGTDGK           | 238 |
| <i>S.pyogenes</i> _MGAS315_WP_011106648.1  | IKGIAFTTSPGRMYPNGTFASEFIGLASLTEDKKTGVKSLVGKTGLEASFDKILSGQDGV          | 235 |
| <i>S.equisimilis</i> _RE378_WP_015017311.1 | IKGIAFSASPGRMYPNGTFASEFIGLASLTEDKKTGVKSLVGKSGLEASFDKILSGQDGV          | 235 |
|                                            | :*** *:*:*.* ***** **.*:*:*: : : . *.*:*:*:*:*:*:*:*:* * *            |     |
| <i>S.pneumoniae</i> _R6_NP_357898.1        | ITYEKDRLGNIVPGTEQVSQRTMDGKDVYTTISSPLQSFMETQMDAFQEKVKGYMTATL           | 293 |
| <i>S.agalactiae</i> _2603V/R_NP_687322.1   | VTYEKDRSGNVLLGTATTERRAVNGKDIYTTLSEPIQTVLETQMDVFAEKTGKFASATV           | 298 |
| <i>S.pyogenes</i> _MGAS315_WP_011106648.1  | ITYQKDRNGATLLGTGKTVKKAIDGKDIYTTLSEPIQTFLETQMDVFAKSNGLASATL            | 295 |
| <i>S.equisimilis</i> _RE378_WP_015017311.1 | ITYQKDRNGNTLLGTGKTVKKAIDGKDIYTTLSEPIQTFLETQMDIFQAKSNGLATATL           | 295 |
|                                            | :**:*:* * : ** . :::::*:*:*:*:*:*:*:*:*:* * * :* : * * :              |     |
| <i>S.pneumoniae</i> _R6_NP_357898.1        | VSAKTGEILATQRPFTDADTKEGITE-DFVW-RDILYQSNEYEPG <b>STMK</b> VVMLAAIDNN  | 351 |
| <i>S.agalactiae</i> _2603V/R_NP_687322.1   | VNAKTGEILATSQRPTYNPSTLKGYDKKNLGTYNLLYDNFFEPG <b>STMK</b> VMTLASAIDSK  | 358 |
| <i>S.pyogenes</i> _MGAS315_WP_011106648.1  | VNAKTGEILATQRPTYNADTLKGLNENTYKQWYSALH-QGNFEPG <b>STMK</b> VMTLAAIDDK  | 354 |
| <i>S.equisimilis</i> _RE378_WP_015017311.1 | VNAKTGEILATQRPTYNADTLKGLNENKDYKQWYSALH-QGNFEPG <b>STMK</b> VMTLAAIDDK | 354 |
|                                            | *.*****:*:*:*:*: . * : * : : : : . : ***** * * : * * . :              |     |
| <i>S.pneumoniae</i> _R6_NP_357898.1        | TFPGGEVFNS-SELKIADATIRDWDVNEGLTGGRMFTFSQGF <b>SSN</b> VGMTLLEQKMGDA   | 410 |
| <i>S.agalactiae</i> _2603V/R_NP_687322.1   | HFNSTEVYNS-AQYKIADAIIRDWDVNEGLSSGSYMTFPQGF <b>SSN</b> VGMTLLEQKMGDA   | 417 |
| <i>S.pyogenes</i> _MGAS315_WP_011106648.1  | VFNPNETFNSANGLTIADATIQDWSINEGISTGQYMNQAQGF <b>SSN</b> VGMTKLEQKMGNA   | 414 |
| <i>S.equisimilis</i> _RE378_WP_015017311.1 | VFNPNETFNSANGLTIADATIQDWSINEGISTGQYMNQAQGF <b>SSN</b> VGMTKLEQKMGNA   | 414 |
|                                            | * * .:.. .***** *:* :*:* : * * .: *****.*****                         |     |
