# Supplementary material for: Restricted Sequence Variation in Streptococcus pyogenes Penicillin Binding Proteins
Source: PubMed Central journal article supplement (PMC7193039; doi:10.1128/msphere.00090-20), 2020-04-29

A

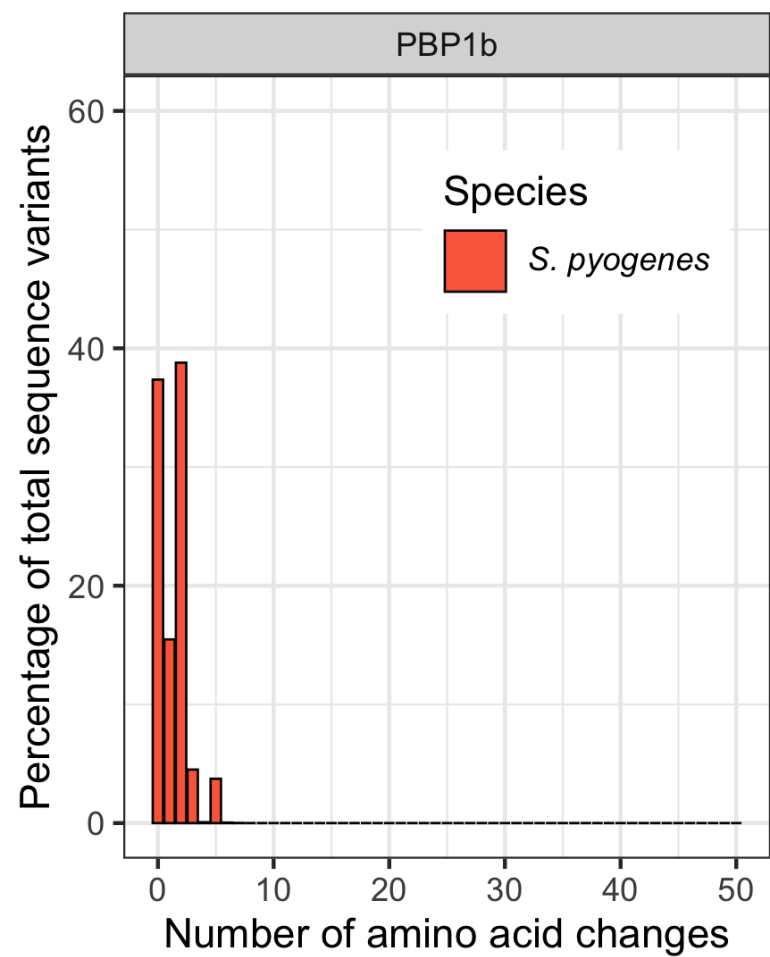

B

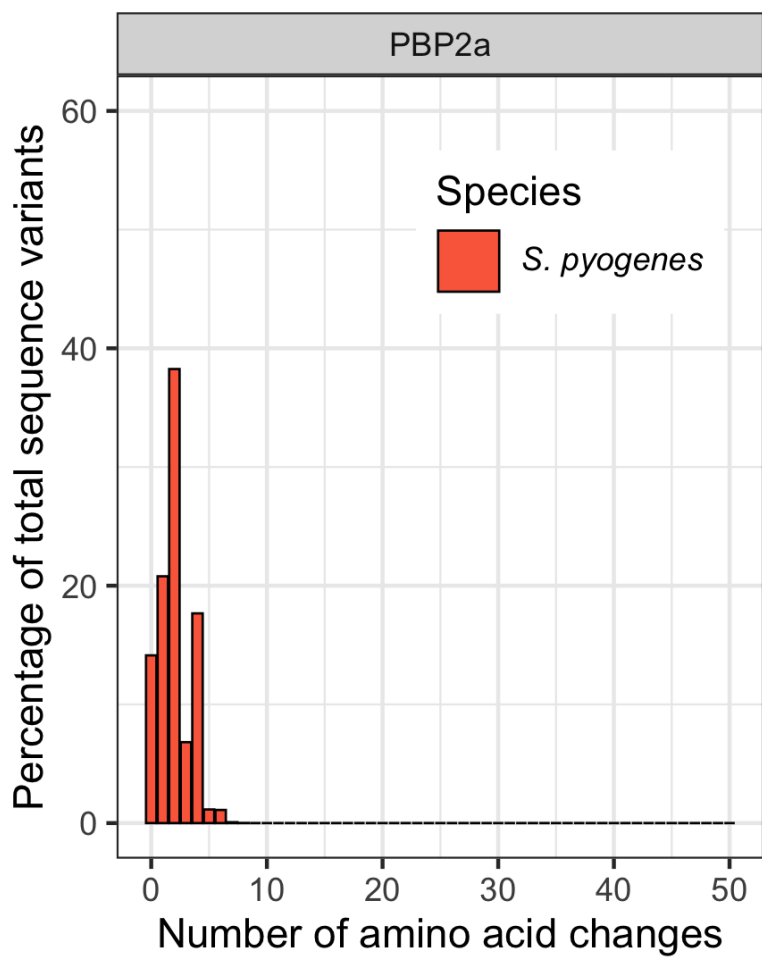

C

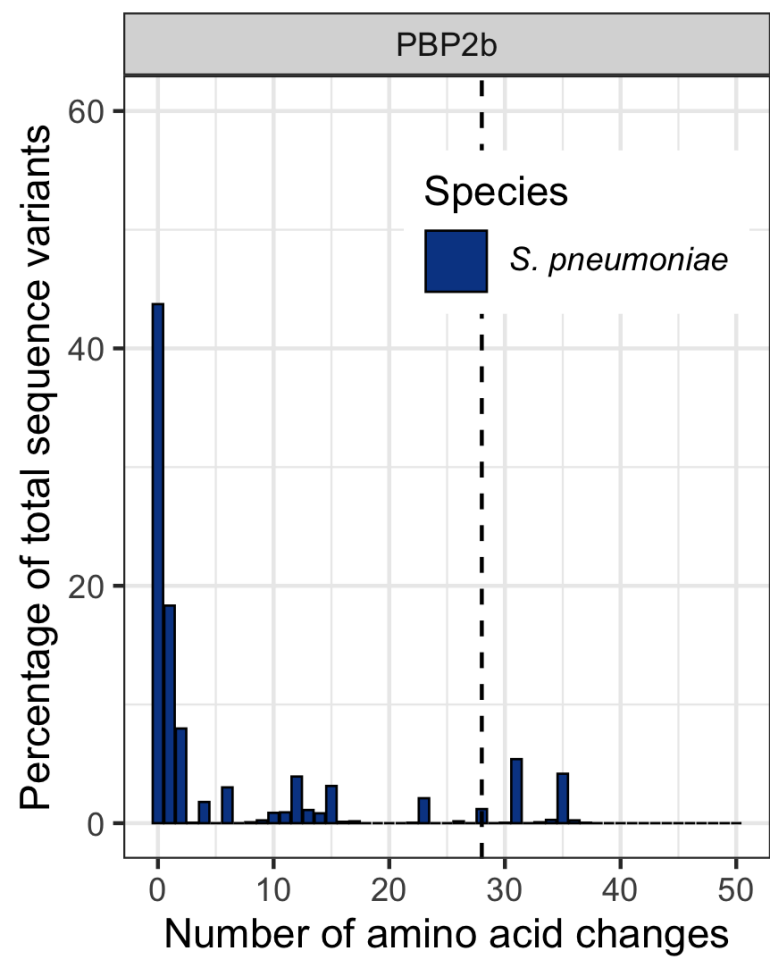

Supplement: mSphere.00090-20-sf003.pdf [file mSphere.00090-20-sf003.pdf]
